# Supplementary material
Source: PubMed Central journal article supplement (PMC3438498)

# Supplementary figure 1

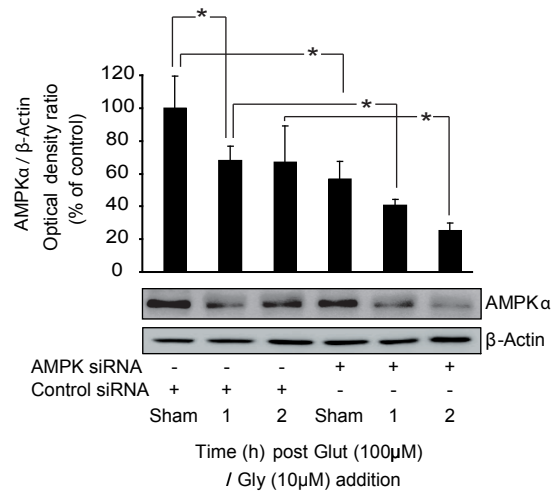

Supplement: cdd201249x1.pdf [file cdd201249x1.pdf]

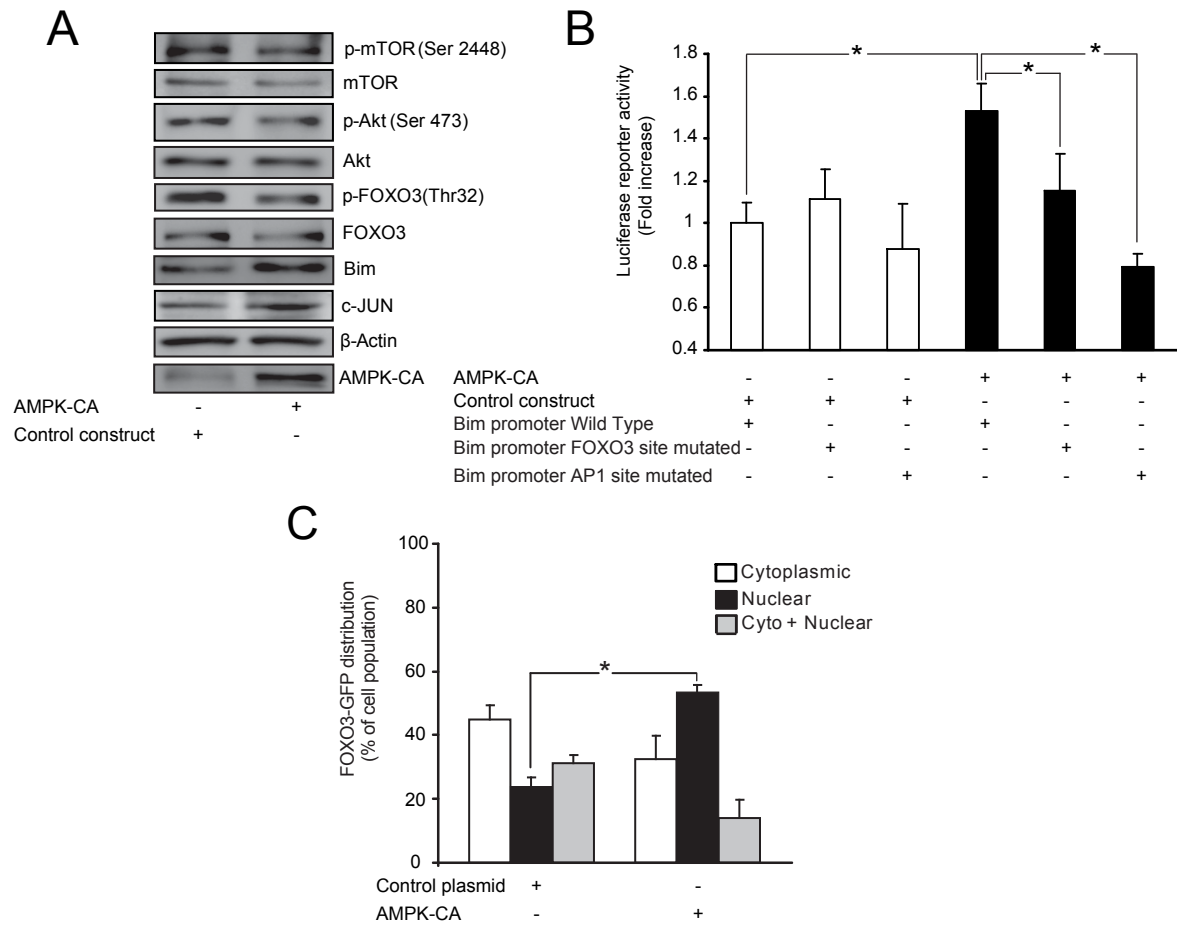

Supplementary Figure 2

Supplement: cdd201249x2.pdf [file cdd201249x2.pdf]

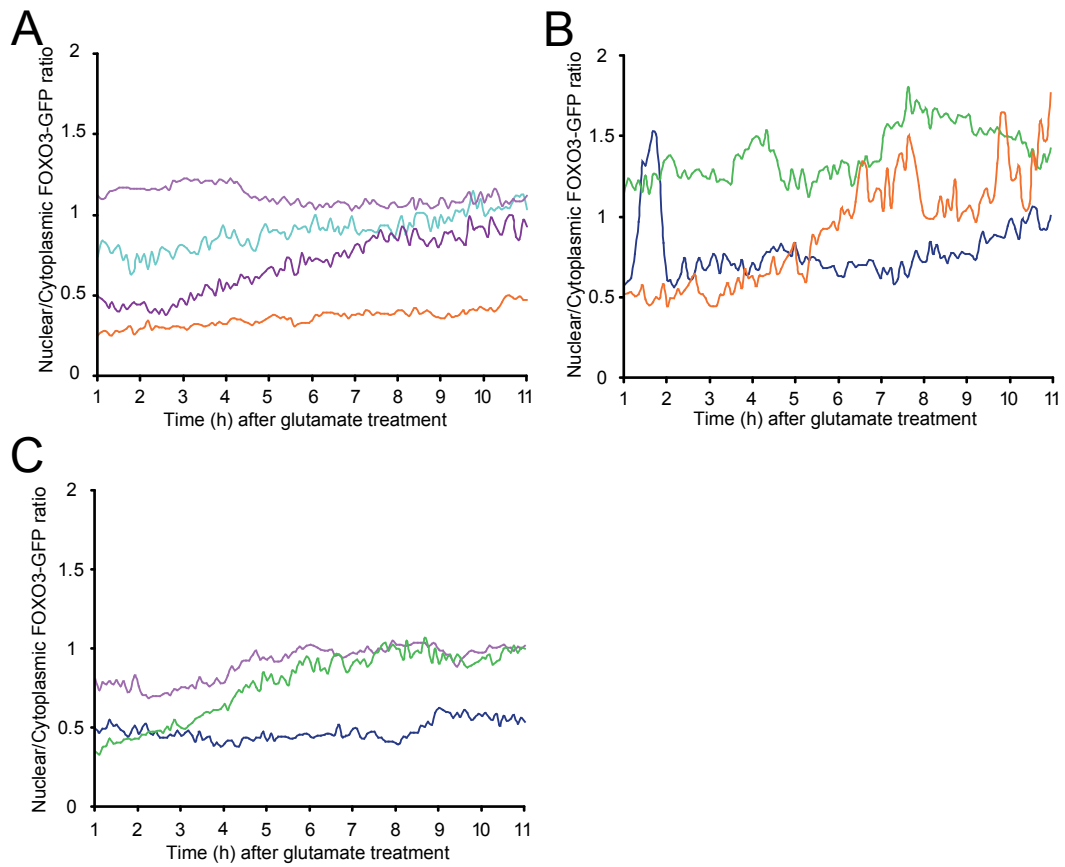

Supplementary Figure 3

Supplement: cdd201249x3.pdf [file cdd201249x3.pdf]

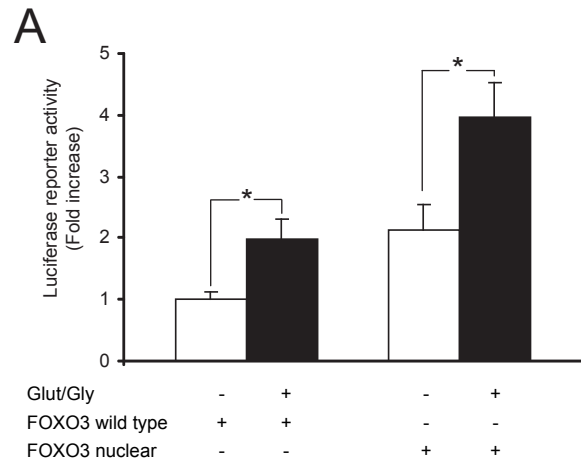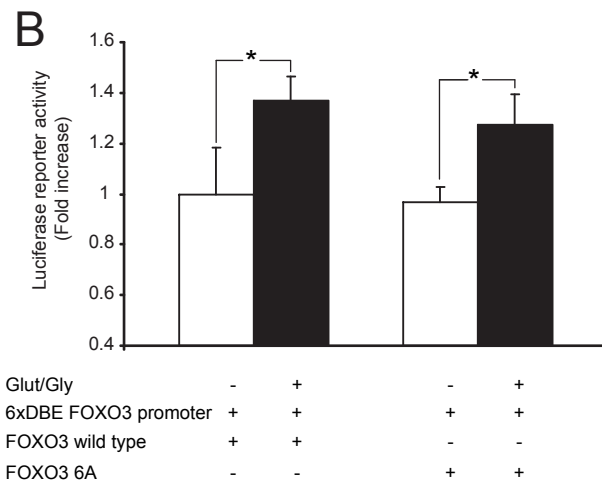

Supplementary Figure 4

Supplement: cdd201249x4.pdf [file cdd201249x4.pdf]
